# Supplementary material for: The heterogeneity of physiological activity for chiral carbon dots derived from l / d / dl -arginine
Source: Royal Society of Chemistry journal article supplement (doi:10.1039/d4tb01294a), 2024-01-01
Supplement: d4tb01294a1.pdf [file d4tb01294a1.pdf]

## Support Information

# The Heterogeneity of Physiological Activity for Chiral Carbon Dots Derived from L/D/DL-Arginine

Fengyuan Liu,<sup>a,#</sup> Jiashan Xia,<sup>a,b,#</sup> Chun Tao,<sup>c</sup> Changmei Chen,<sup>a</sup> Xiangshu Cheng,<sup>a</sup> Rongchun Yi,<sup>a</sup> Lulu Wang,<sup>a</sup> Yue Wang,<sup>d\*</sup> Tao Deng<sup>a\*</sup>

<sup>a</sup> College of Pharmacy, Chongqing Medical University, Chongqing 400016, China

<sup>b</sup> Chongqing Key Laboratory of Prevention and Treatment for Occupational Diseases and Poisoning, The First Affiliated Hospital of Chongqing Medical and pharmaceutical College, Chongqing 400060, P.R. China

<sup>c</sup> Pharmacy department, Zigong Fourth People's Hospital, Zigong, Sichuan, China, 643000

<sup>d</sup> NHC Key Laboratory of Diagnosis and Treatment on Brain Functional Diseases, The First Affiliated Hospital of Chongqing Medical University, Chongqing, 400016, P. R. China

# These authors contribute equally.

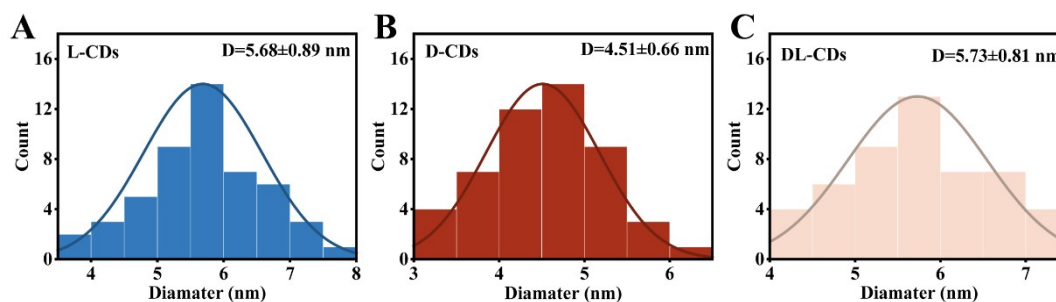

Fig. S1 Particle size of (A) L-CDs, (B) D-CDs and (C) DL-CDs analyzed from TEM image.

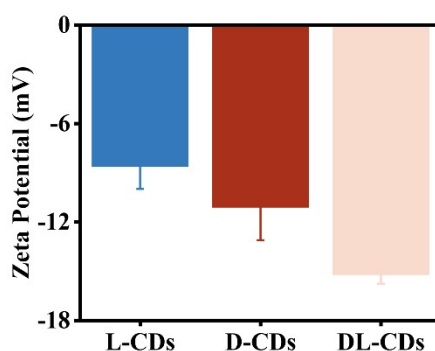

Fig. S2 Zeta potential of L-CDs, D-CDs and DL-CDs in H<sub>2</sub>O.

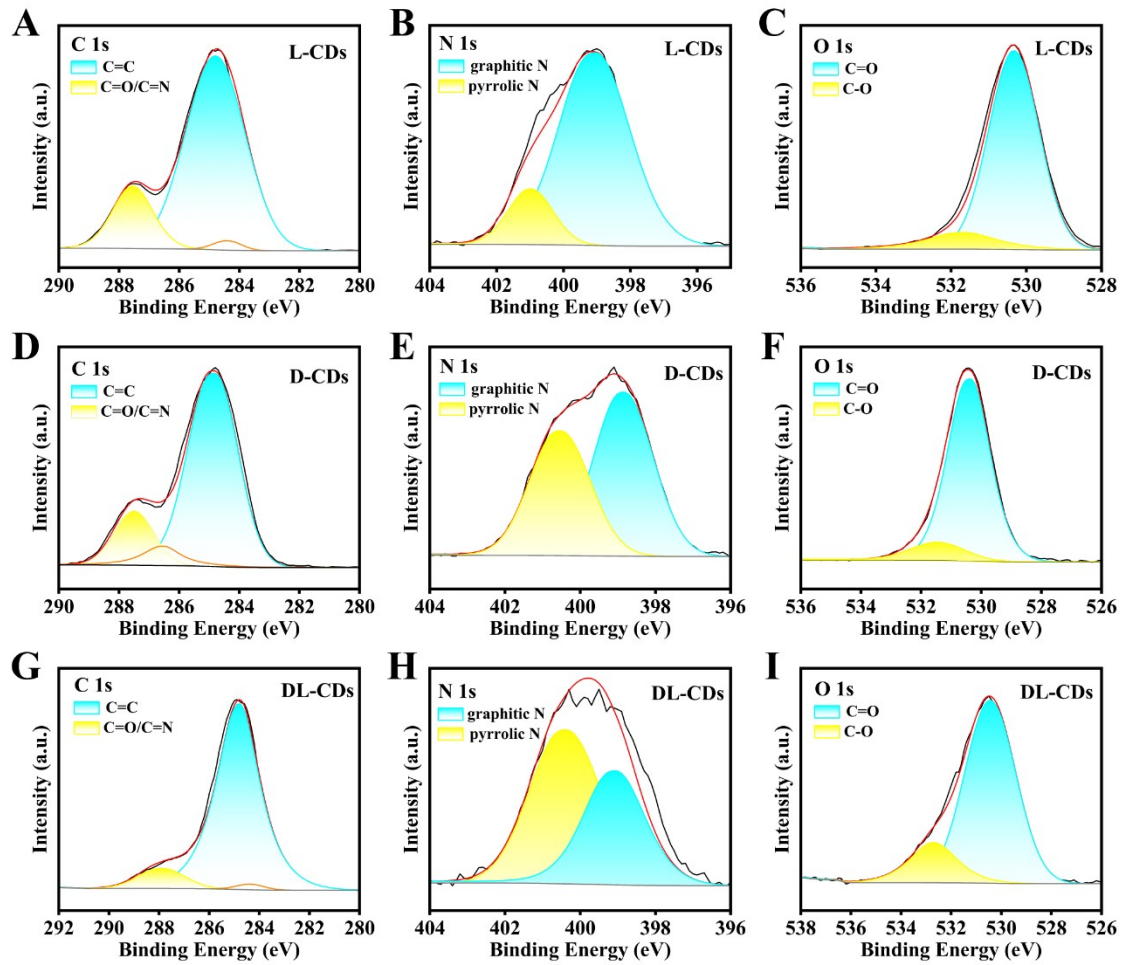

**Fig. S3** The High resolution XPS spectra of (A) C 1s, (B) N 1s, (C) O 1s of L-CDs with identification of peaks by curve fitting. the High resolution XPS spectra of (D) C 1s, (E) N 1s, (F) O 1s of D-CDs with identification of peaks by curve fitting. the High resolution XPS spectra of (G) C 1s, (H) N 1s, (I) O 1s of DL-CDs with identification of peaks by curve fitting.

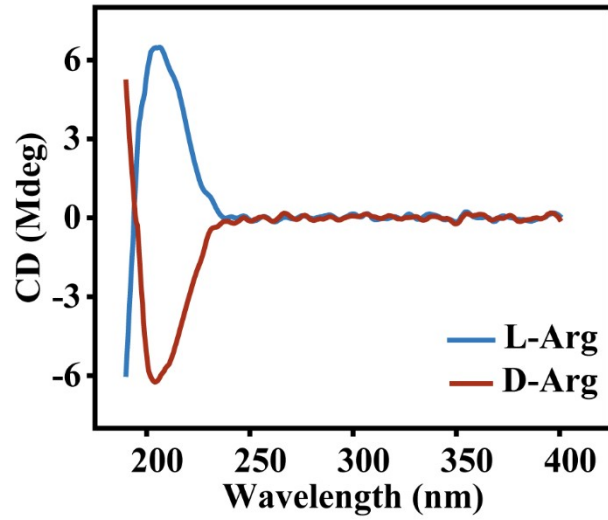

Fig. S4 CD spectra of L-Arg and D-Arg.

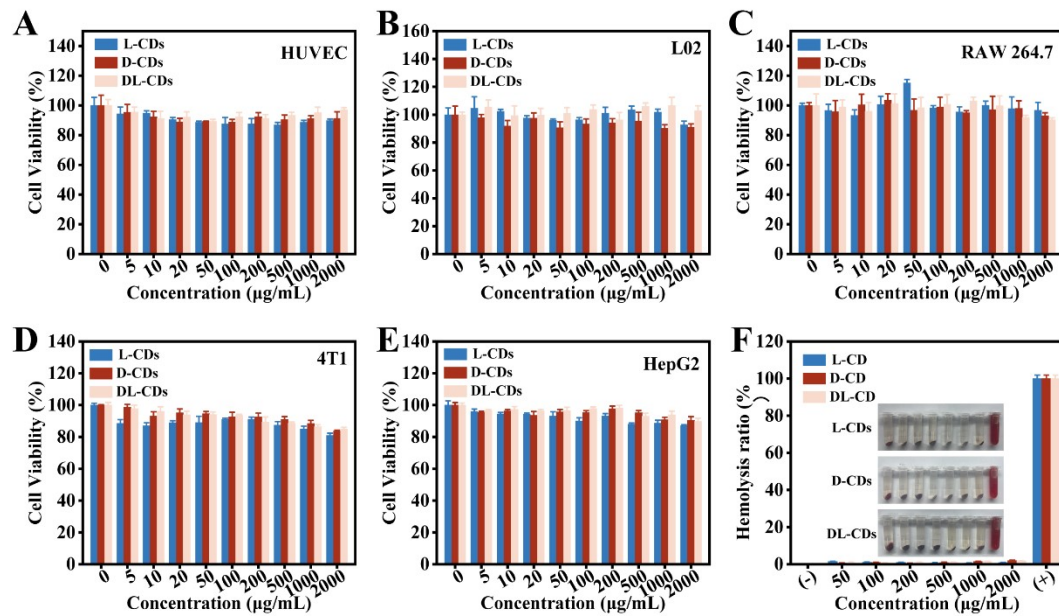

Fig. S5 Cytotoxicity test of L-CDs, D-CDs and DL-CDs to (A) HUVEC, (B) L02, (C) RAW 264.7, (D) 4T1 and (E) HepG2 cells. (F) Hemolytic activities of L-CDs, D-CDs and DL-CDs to red blood cells (RBCs). Insets: photographs of corresponding RBC solutions. (n = 5/group)

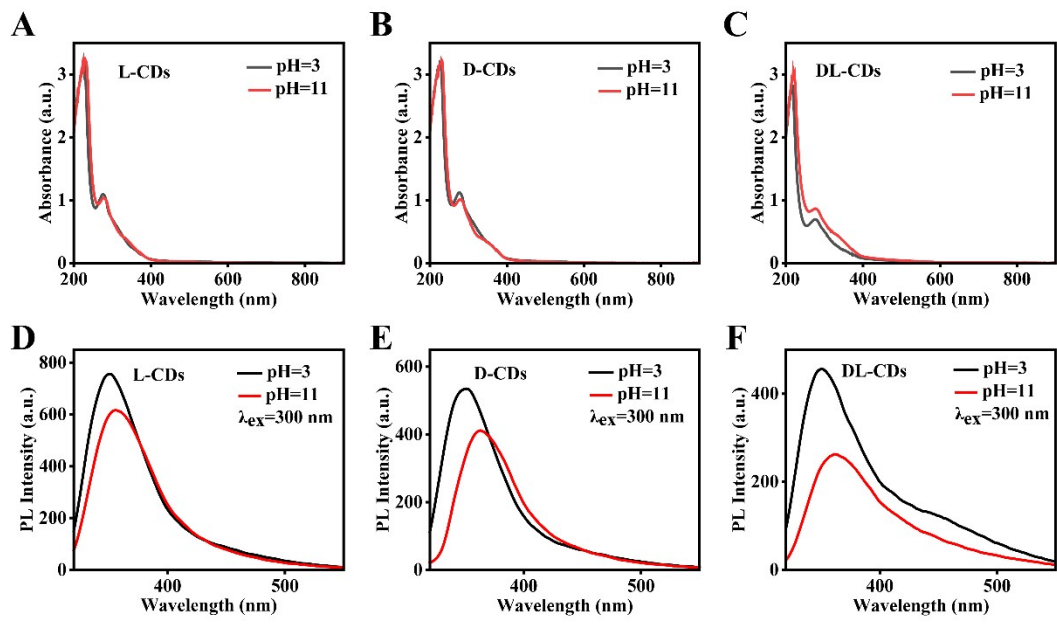

**Fig. S6** The UV spectra of (A) L-CDs, (B) D-CDs and (C) DL-CDs at pH 3 and 11. The emission spectra of (D) L-CDs, (E) D-CDs and (F) DL-CDs at the excitation wavelength of 300 nm.

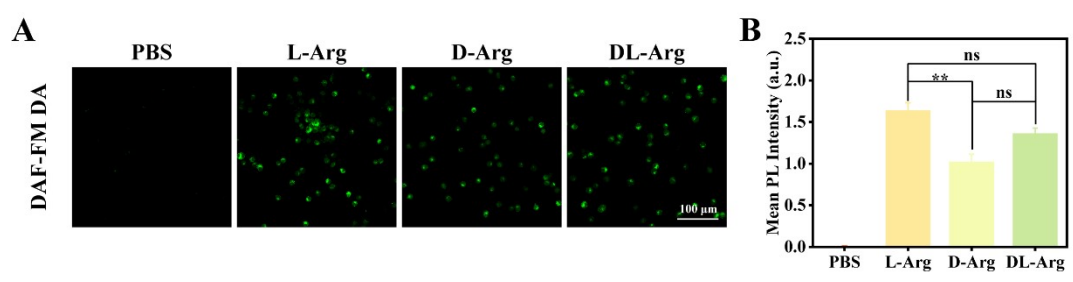

**Fig. S7** (A) Respective fluorescence images of RAW 264.7 cells under L-Arg, D-Arg and DL-Arg after incubation with DAF-FM DA. Scale bar: 100  $\mu$ m. (B) The statistics of mean fluorescence intensity by using ImageJ according to the images.

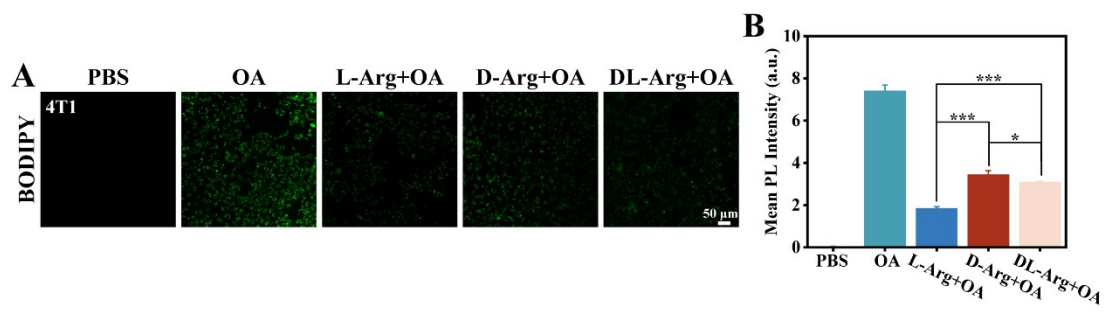

**Fig. S8** (A) Respective fluorescence images of 4T1 cells under indicated treatment after incubation with BODIPY 493/503. Scale bar: 50  $\mu$ m. (B) The statistics of mean fluorescence intensity by using ImageJ according to the images.

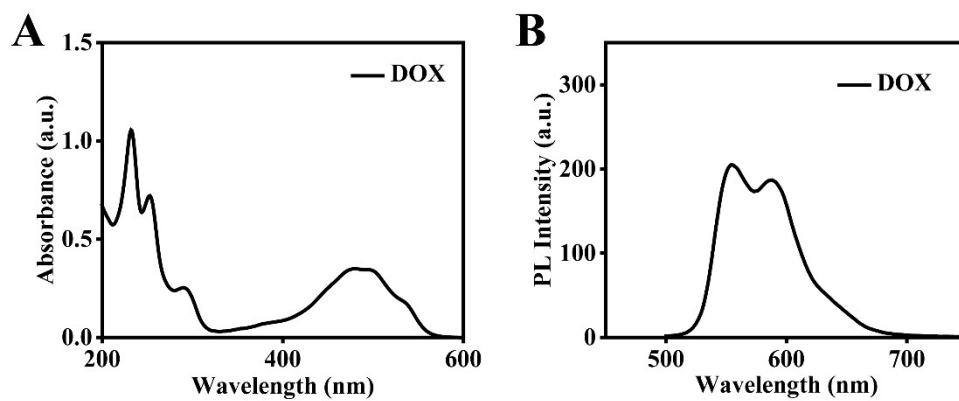

**Fig. S9** (A) The UV spectra of DOX. (B) The emission spectra of DOX at the excitation wavelength of 488 nm.

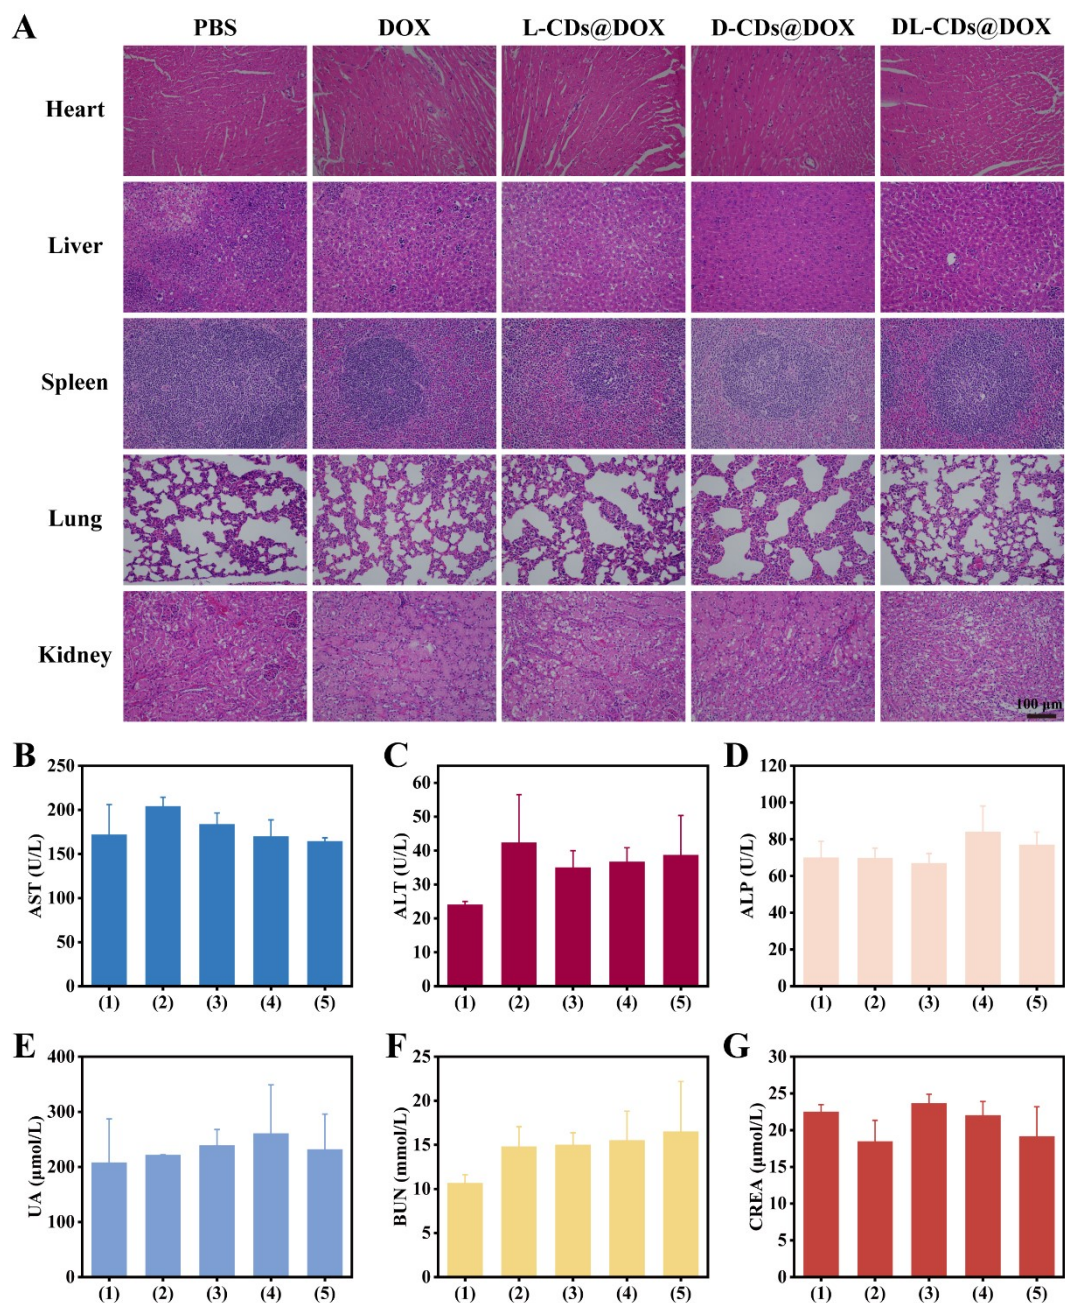

**Fig. S10** (A) H&E staining images of major organs from different groups. Scale bar: 100  $\mu\text{m}$ . The liver function of mice evaluated by (B) AST, (C) ALT and (D) ALP. The kidney function of mice evaluated by (E) UA, (F) BUN and (G) CREA. (n=6/group)
